# Supplementary material for: Cadmium induced apoptosis in mouse primary hepatocytes: the role of oxidative stress-mediated ERK pathway activation and the involvement of histone H3 phosphorylation
Source: Royal Society of Chemistry journal article supplement (doi:10.1039/c5ra03210e), 2015-01-01
Supplement: c5ra03210e1.pdf [file c5ra03210e1.pdf]

# **Cadmium induced apoptosis in mouse primary hepatocytes: the role of oxidative stress-mediated ERK pathway activation and the involvement of histone H3 phosphorylation<sup>†</sup>**

**Jing Wang, Minglu Hao, Chunguang Liu, Rutao Liu\***

School of Environmental Science and Engineering, Shandong University, China -America CRC for  
Environment & Health, Shandong Province, 27# Shanda South Road, Jinan 250100, P. R. China

To whom correspondence should be addressed: Rutao Liu, School of Environmental Science and  
Engineering, Shandong University, Jinan, Shandong province, P.R. China. Phone/Fax: 86-531-  
88365489. Email: [rutaoliu@sdu.edu.cn](mailto:rutaoliu@sdu.edu.cn)

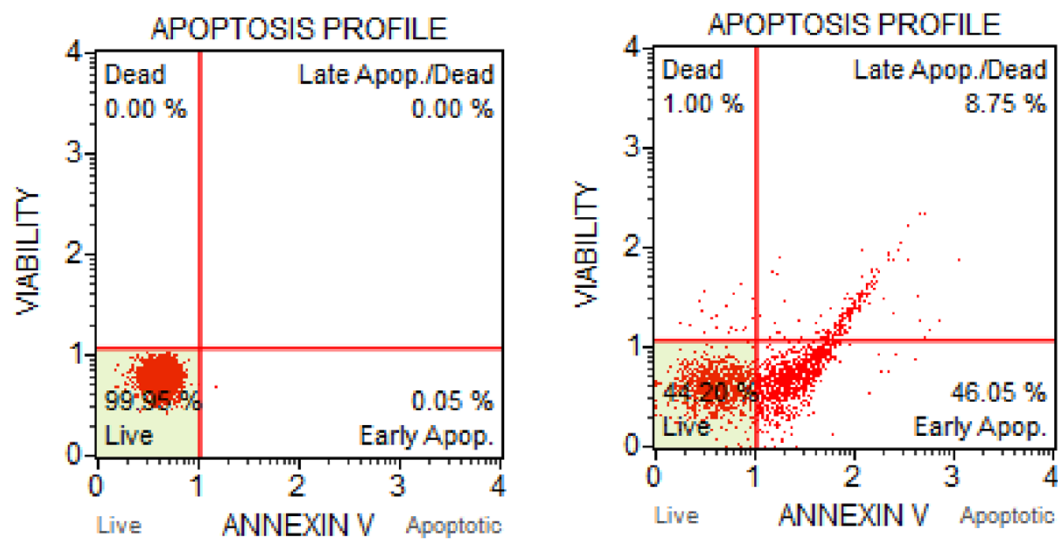

**Fig.S1** Representative images of percentage of apoptotic cells. (Left), blank control, condition: 24 h incubation of the hepatocytes without Cd treatment. (Right), positive control, condition: 15 min incubation of the untreated hepatocytes (without Cd treatment) with 100 μM H<sub>2</sub>O<sub>2</sub>.

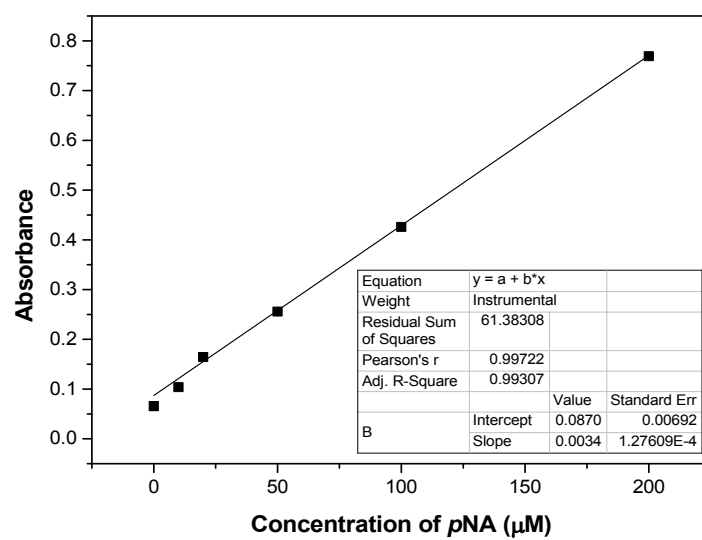

**Fig.S2** Standard curve of caspase-3 assay. The equation and other parameters of the curve are inserted in the figure.

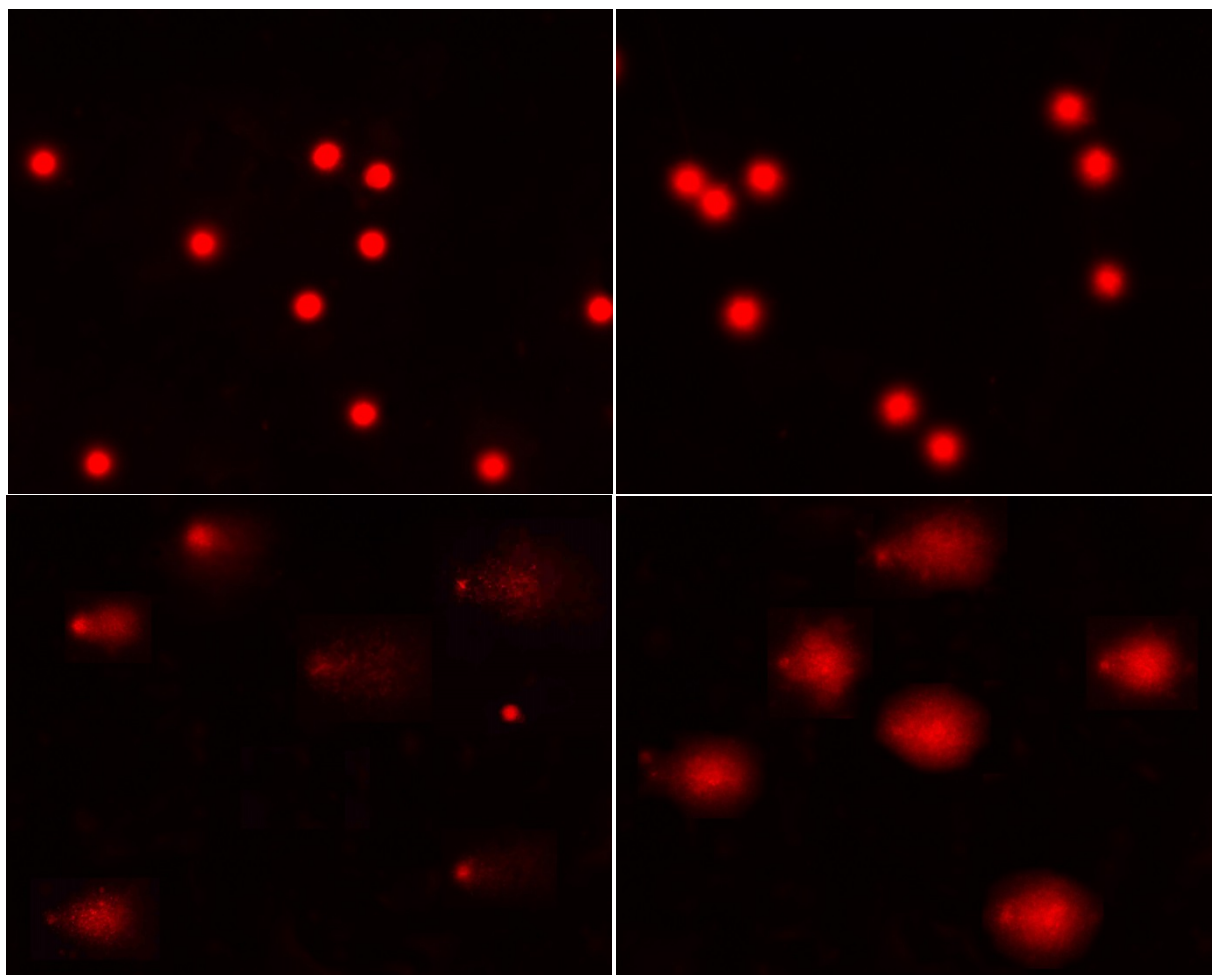

**Fig.S3** Representative images of comet assay of positive controls and 6 h Cd treatment. (Left top), 6 h incubation of the hepatocytes without Cd treatment. (Right top), 6 h incubation of the hepatocytes with 10  $\mu$ M Cd treatment. (Left bottom), positive control of 6 h treatment, 30 min exposure of the untreated hepatocytes (without Cd treatment) with ultraviolet irradiation. (Right bottom), positive control of 24 h treatment, 30 min exposure of the untreated hepatocytes (without Cd treatment) with ultraviolet irradiation.

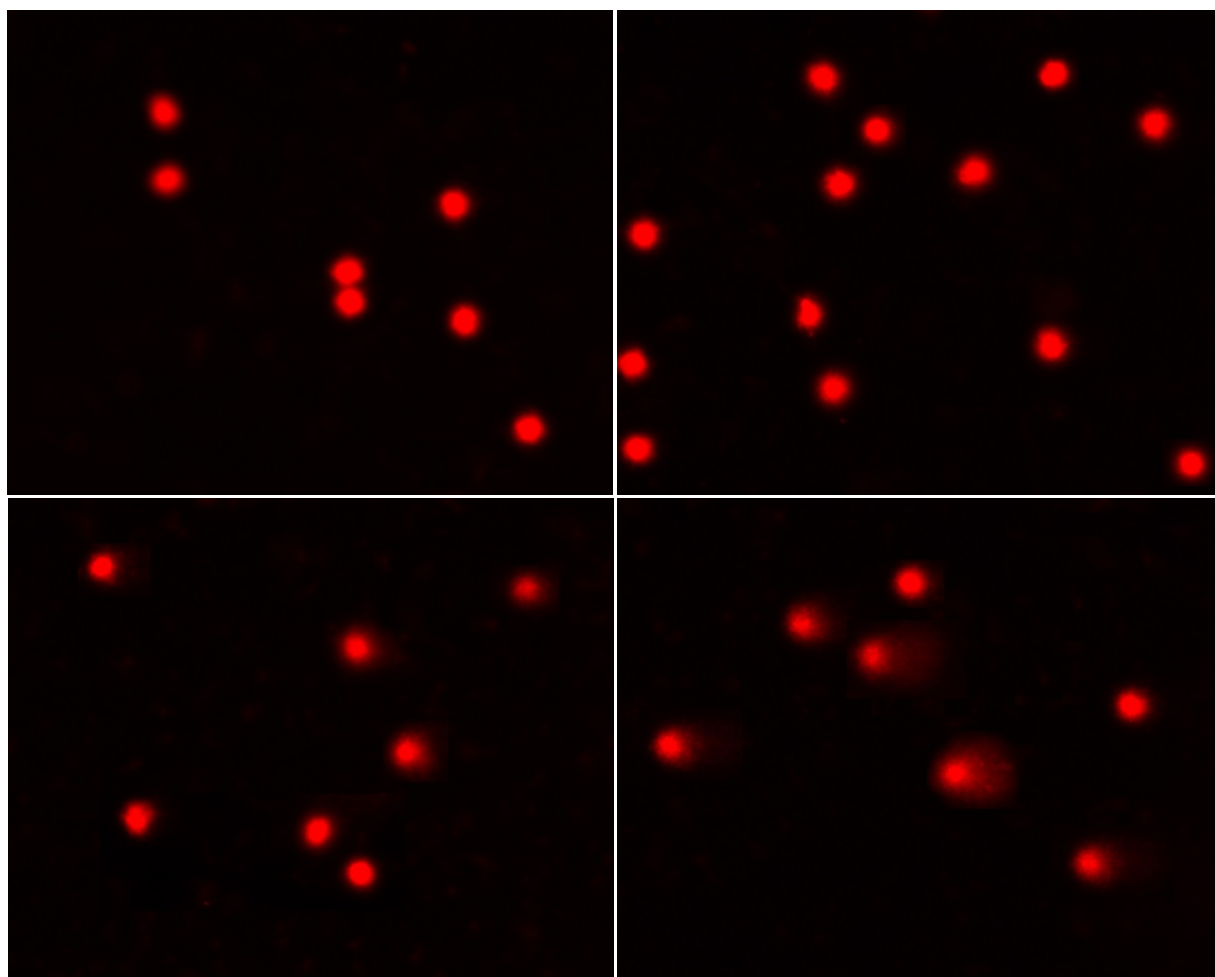

**Fig.S4** Representative images of comet assay after 24 h Cd treatment without NAC pretreatment. Cd concentration: (Left top), 0  $\mu$ M. (Right top), 0.1  $\mu$ M. (Left bottom), 1  $\mu$ M. (Right bottom), 10  $\mu$ M.

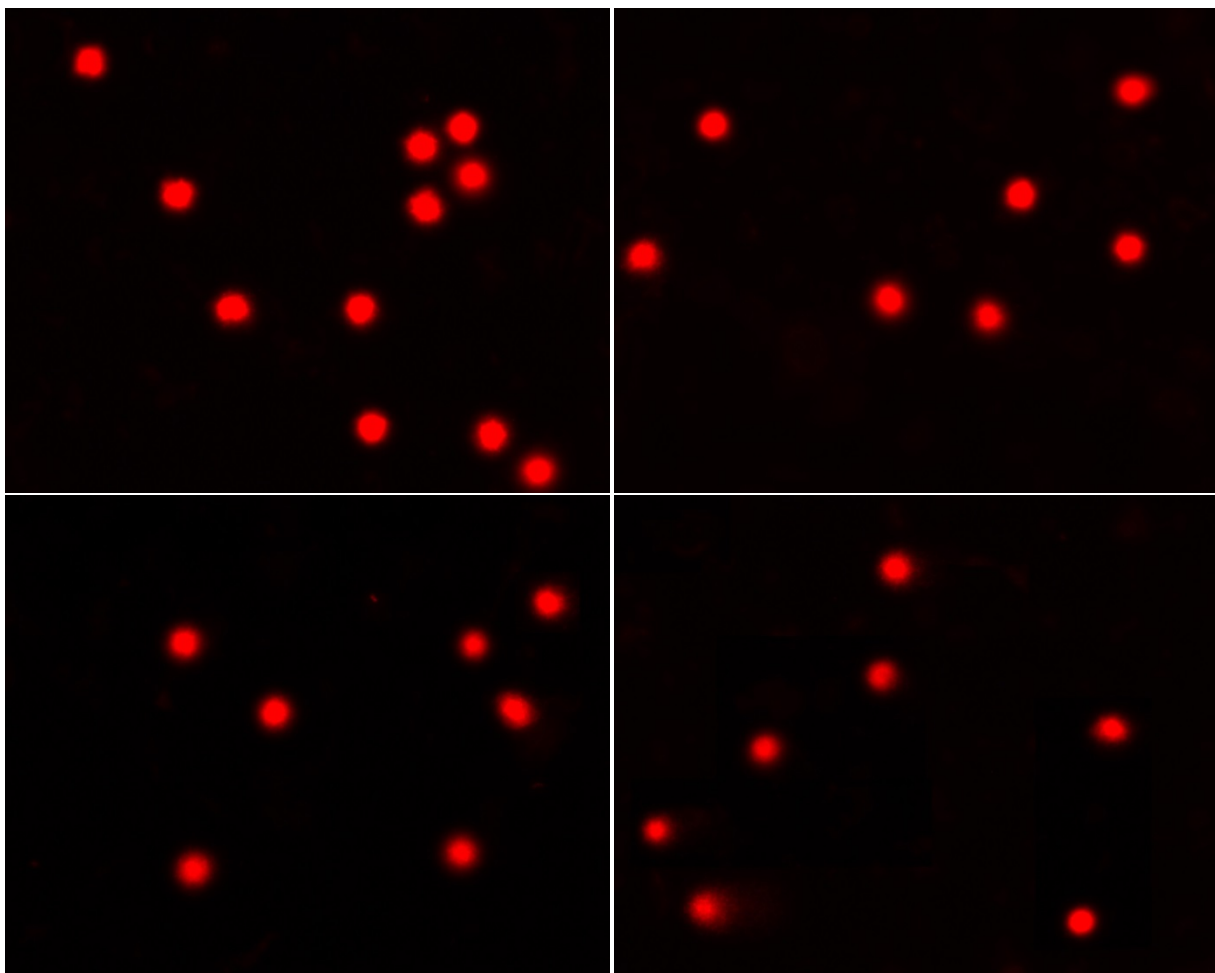

**Fig.S5** Representative images of comet assay after 24 h Cd treatment with NAC pretreatment. Cd concentration: (Left top), 0  $\mu$ M. (Right top), 0.1  $\mu$ M. (Left bottom), 1  $\mu$ M. (Right bottom), 10  $\mu$ M.

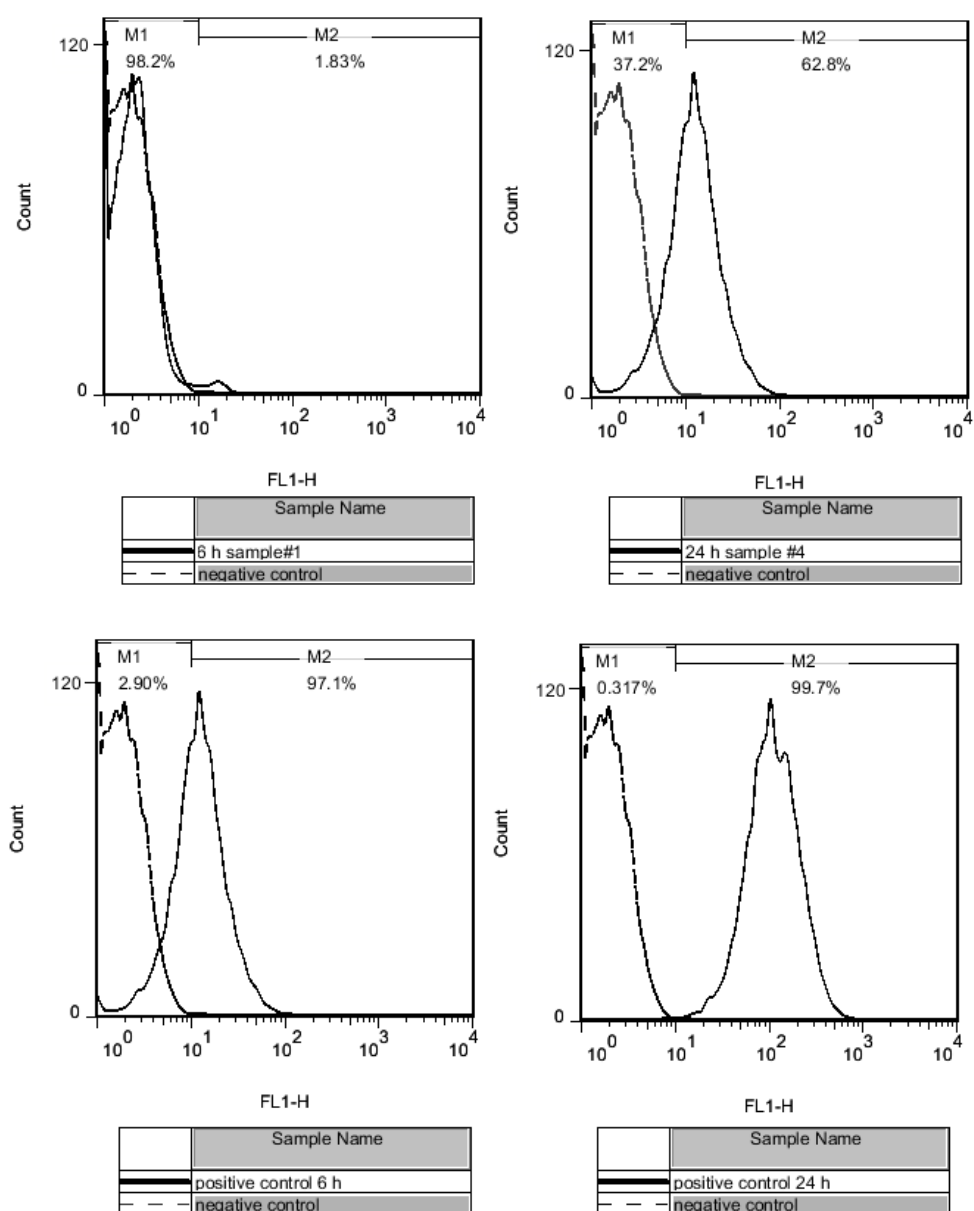

**Fig.S6** Representative images of ROS level assay. Condition: (Left top), 6 h incubation of the hepatocytes without Cd treatment. (Right top), 24 h incubation of the hepatocytes with 10  $\mu$ M Cd treatment. (Left bottom), positive control of 6 h treatment, 15 min incubation of the untreated (without Cd treatment) hepatocytes with 100  $\mu$ M  $H_2O_2$ . (Right bottom), positive control of 24 h treatment, 15 min incubation of the untreated (without Cd treatment) hepatocytes with 100  $\mu$ M  $H_2O_2$ .

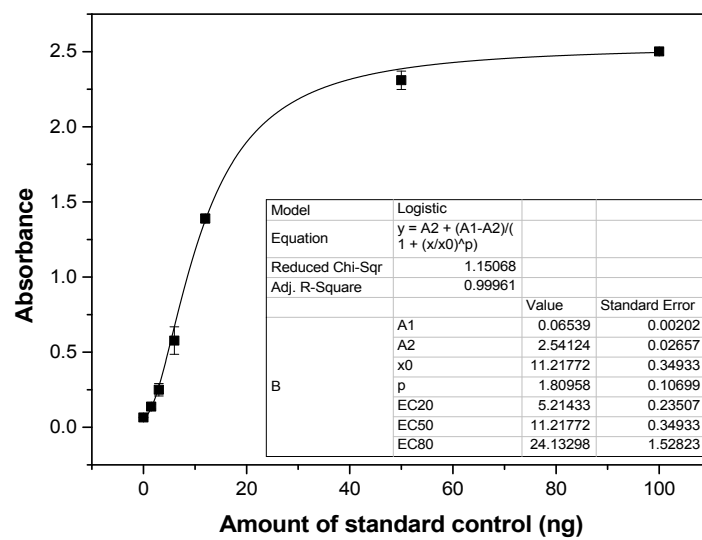

**Fig.S7** Standard curve of histone H3 phosphorylation. The equation and other parameters of the curve are inserted in the figure.
